# Supplementary material for: Male cuticular pheromones stimulate removal of the mating plug and promote re-mating through pC1 neurons in Drosophila females
Source: eLife. 2024 Sep 10;13:RP96013. doi: 10.7554/eLife.96013 (PMC11386958; doi:10.7554/eLife.96013)
Supplement: Source data 1. [file elife-96013-data1.xlsx]

## Sheet: Fig 1
B			C			D			E				F
alone	with male		alone	with virgin female		alone	with male		Alone	with intact male	with decapitated male		Orco	Orco with male
10.661	-45.339		1.33333	-17.6667		-42.0833	-66.0833		9.8	-62.2	-75.2		5.70909	23.7091
-21.339	-59.339		-29.6667	11.3333		10.9167	-23.0833		-6.2	38.8	-41.2		20.7091	22.7091
-27.339	-50.339		5.33333	-1.66667		10.9167	-31.0833		-2.2	-16.2	-15.2		-35.2909	-60.2909
5.66102	-27.339		-39.6667	2.33333		-18.0833	-37.0833		32.8	-71.2	-36.2		6.70909	-7.29091
			-25.6667	-40.6667		-0.08333	-48.0833		-19.2	-36.2	-68.2		-40.2909	-4.29091
-9.33898	-41.339		-14.6667	1.33333		10.9167	-51.0833		-20.2	-26.2	-33.2		-9.29091	-8.29091
-47.339	-44.339		-20.6667	17.3333		10.9167	-66.0833		-5.2	-43.2	-25.2		21.7091	-4.29091
-41.339	-78.339		1.33333	-7.66667		67.9167	-28.0833		-44.2	-89.2	-8.2		-8.29091	38.7091
-47.339	-43.339		10.3333	-5.66667		-26.0833	-37.0833		22.8	-22.2	-15.2		31.7091	-5.29091
			-45.6667			5.91667	-26.0833		4.8	-37.2	-41.2		20.7091	-57.2909
90	-44.339		69.3333	-27.6667		-19.0833	-35.0833		-24.2	-9.2	-44.2		5.70909	-39.2909
-53.339	-50.339		7.33333	14.3333		-12.0833	-50.0833		24.8	-35.2	-34.2		-32.2909	-31.2909
-60.339	-10.339		-20.6667	-5.66667					-20.2	-54.2	-77.2		-24.2909	17.7091
-22.339	-26.339		-1.66667	-22.6667					-12.2	-46.2	-55.2		-18.2909	-39.2909
			25.3333	-53.6667					-7.2	-36.2	-73.2		4.70909	-37.2909
	-18.339		-44.6667	-6.66667					18.8	-35.2	26.8		14.7091	3.70909
	-47.339		35.3333						33.8	-39.2	-44.2		29.7091	-15.2909
	-59.339		87.3333						5.8	-32.2	-26.2		-24.2909	-8.29091
	-50.339								5.8		-32.2		-28.2909	-12.2909
									1.8		-39.2		-24.2909	19.7091
-46.339	-27.339										-29.2		41.7091	7.70909
-17.339	-42.339										-37.2		-27.2909	-15.2909
-4.33898	-54.339										14.8		-22.2909	49.7091
-18.339	-34.339												37.7091	18.7091
													26.7091	-10.2909
41.661	-18.339												-49.2909	-46.2909
-33.339	-22.339												19.7091	8.70909
-20.339	-42.339												39.7091	-26.2909
-1.33898	-29.339												-24.2909	-45.2909
													21.7091	10.7091
-27.339	-34.339												34.7091	-10.2909
-18.339	-43.339												-7.29091	-9.29091
6.66102	7.66102												-41.2909	-37.2909
3.66102	-2.33898												-2.29091	-25.2909
													14.7091	-15.2909
	-40.339												47.7091	45.7091
	-45.339												10.7091	-0.29091
	-27.339												23.7091	-37.2909
													0.709091	-12.2909
													2.70909	23.7091
33.661	1.66102												13.7091	24.7091
-7.33898	25.661												-4.29091	1.70909
28.661	90												12.7091	38.7091
-5.33898	0.661017												-10.2909	-21.2909
													13.7091	34.7091
16.661													20.7091	-60.2909
	-15.339												-35.2909	39.7091
-45.339	90												-35.2909
-4.33898	-66.339												-30.2909
	-61.339												-23.2909
													-7.29091
													16.7091
													-50.2909
													30.7091
													22.7091
-38.339	4.66102
-8.33898	4.66102
-32.339	-20.339
	-22.339
90	-19.339
13.661	-50.339
46.661	-22.339
7.66102	-15.339
47.661	-35.339
-9.33898	-25.339
90	-23.339
0.661017	-29.339
-5.33898	-32.339
	90
	-35.339
45.661
-7.33898	-27.339
36.661	-40.339
-9.33898	-20.339
-14.339	41.661
7.66102	16.661
90	3.66102
7.66102	-46.339
34.661	-7.33898
13.661	-35.339
-39.339	-22.339
-10.339	-45.339
-0.33898	-48.339
45.661	-31.339
-23.339	-20.339
-44.339	-14.339

## Sheet: Fig 2
A					B							C					D							E
Or47b>TNTact	Or47b>TNTact with male	Or47b>TNTinact	Or47b>TNTinact with male		Or47b>+, 20'c	Or47b>+, 30'c	+>dTRPA1, 20'c	+>dTRPA1, 30'c	Or47b>dTRPA1, 20'c	Or47b>dTRPA1, 30'c		GAL4-Or47b>UAS-Orco; Orco1	GAL4-Or47b>UAS-Orco; Orco1 with male	Orco1	Orco1 with male		Or47b2 x Or47b3	Or47b2 x Or47b3 with male	Or47b3 x w	Or47b3 x w with male	Or47b2 x w	Or47b2 x w with male		GAL4-Or47b>UAS-Or47b; Or47b2	GAL4-Or47b>UAS-Or47b; Or47b2 with male	Or47b2	Or47b2 with male
59.375	-23.625	-9.78571	-31.7857		-93.5357	-16.5357	45.5238	5.52381	-11.5455	-0.54545		16.2308	21.2308	29.5	23.5		-13.3846	3.61538	-4.69231	-39.6923	20.3333	-34.6667		-5.18182	-21.1818	15.9286	-40.0714
-40.625	-15.625	4.21429	-33.7857		31.4643	110.464	50.5238	-25.4762	12.4545	-51.5455		27.2308	-58.7692	-11.5	27.5		-0.38462	-2.38462	6.30769	-30.6923	3.33333	-46.6667		-24.1818	-15.1818	-42.0714	-55.0714
39.375	-27.625	11.2143	-49.7857		-23.5357	-23.5357	-21.4762	-17.4762	-41.5455	-4.54545		-42.7692	-10.7692	-53.5	-6.5		-14.3846	2.61538	6.30769	-37.6923	-23.6667	-45.6667		58.8182	-36.1818	29.9286	-4.07143
30.375	-0.625	-0.78571	-51.7857		-8.53571	-39.5357	60.5238	35.5238	15.4545	-42.5455		23.2308	9.23077	0.5	5.5		11.6154	-10.3846	-5.69231	-30.6923	15.3333	-45.6667		-4.18182	-53.1818	-63.0714	-11.0714
-20.625	-34.625	-4.78571	-10.7857		30.4643	98.4643	-31.4762	28.5238	-109.545	-47.5455		-21.7692	-25.7692	9.5	31.5		34.6154	-12.3846	4.30769	-18.6923	32.3333	-60.6667		14.8182	-50.1818	16.9286	-54.0714
19.375	68.375	-50.7857	12.2143		-94.5357	36.4643	-13.4762	-19.4762	5.45455	-94.5455		-45.7692	-60.7692	2.5	-57.5		-3.38462	-19.3846	9.30769	-11.6923	23.3333	-24.6667		-47.1818	-21.1818	39.9286	14.9286
-33.625	6.375	-13.7857	-62.7857		-46.5357	-6.53571	-41.4762	-28.4762	-17.5455	-68.5455		-54.7692	-49.7692	-17.5	43.5		-20.3846	-3.38462	-18.6923	-54.6923	-1.66667	-27.6667		33.8182	-28.1818	78.9286	8.92857
28.375	18.375	16.2143	-37.7857		15.4643	-11.5357	7.52381	-41.4762	47.4545	-4.54545		1.23077	-73.7692	-30.5	-30.5		14.6154	-3.38462	11.3077	-17.6923	0.333333	-37.6667		23.8182	-35.1818	-63.0714	48.9286
-15.625	-2.625	20.2143	-29.7857		104.464	-34.5357	-6.47619	-58.4762	37.4545	22.4546		17.2308	-39.7692	23.5	-29.5		10.6154	9.61538	3.30769	-25.6923	-3.66667	-41.6667		25.8182	-77.1818	-8.07143	10.9286
-19.625	-64.625	8.21429	1.21429		76.4643	-20.5357	3.52381	-36.4762	69.4545	-30.5455		-37.7692	13.2308	24.5	-13.5		-5.38462	-15.3846	17.3077	-34.6923	1.33333	1.33333		-66.1818	-64.1818	-17.0714	20.9286
-16.625	-37.625	16.2143	-36.7857		-11.5357	-35.5357	16.5238	20.5238	-7.54545	-84.5455		11.2308	-16.7692	-20.5	-51.5		-19.3846	-24.3846	1.30769	-0.69231	-30.6667	-30.6667		-10.1818	-81.1818	-5.07143	7.92857
-23.625	-26.625	-23.7857	-12.7857		42.4643	-38.5357	2.52381	-61.4762		-46.5455		48.2308	-63.7692	43.5	-11.5		-4.38462	-12.3846	-16.6923	-18.6923	-36.6667	-48.6667				15.9286	17.9286
-35.625	-37.625	1.21429	23.2143		-26.5357	-30.5357	18.5238	-19.4762		9.45454		58.2308	-25.7692				9.61538		-13.6923	-46.6923		-63.6667				-14.0714	-23.0714
19.375	-4.625	26.2143	-63.7857		-14.5357	-27.5357	-17.4762	-34.4762		-83.5455			-10.7692							-26.6923		-63.6667				14.9286	27.9286
-46.625	-52.625				-6.53571	-46.5357	-35.4762	-4.47619		-69.5455												-37.6667					-7.07143
56.375	-15.625				38.4643	-68.5357	-44.4762	-18.4762
	41.375				-41.5357	-52.5357	2.52381
	23.375				-23.5357	29.4643	-17.4762
					32.4643	-27.5357	-9.47619
					37.4643	-14.5357	50.5238
					-28.5357	22.4643	-19.4762
					43.4643	55.4643
					50.4643	-21.5357
					-34.5357	-63.5357
					-3.53571	-19.5357
					-9.53571	-34.5357
					10.4643	51.4643
					-46.5357	30.4643
						-13.5357
						-59.5357
						-17.5357

## Sheet: Fig 3
A			B			C			D
with Vehicle	with 2MC		with Vehicle	with 2MC		with Vehicle	with 2MC		Or47b>Orco; Orco1 with HX	Or47b>Orco; Orco1 with 2me-C24	Or47b>+; Orco1 with HX	Or47b>+; Orco1 with 2me-C24	+>Orco; Orco1 with HX	+>Orco; Orco1 with 2me-C24
-29.3846	-13.3846		-11.9091	-6.90909		-32.5714	-19.5714		-13.0288	-56.5325	42.9712	36.4675	4.97121	36.4675
-14.3846	27.6154		-0.90909	28.0909		-21.5714	-43.5714		51.9712	29.4675	60.9712	-6.53247	-23.0288	-19.5325
-17.3846	-24.3846		3.09091	-13.9091		-34.5714	-19.5714		-18.0288	-30.5325	-18.0288	15.4675	-25.0288	-14.5325
-7.38462	-14.3846		-2.90909	-33.9091		5.42857	-18.5714		2.97121	-5.53247	-23.0288	-4.53247	17.9712	-20.5325
1.61539	0.615385		-29.9091	39.0909		-16.5714	54.4286		-18.0288	-12.5325	-17.0288	20.4675	-22.0288	5.46753
-2.38462	-10.3846		4.09091	-65.9091		5.42857	-1.57143		-11.0288	-27.5325	-54.0288	-9.53247	-38.0288	-21.5325
-4.38462	-22.3846		-24.9091	7.09091		57.4286	37.4286		-16.0288	-2.53247	-33.0288	9.46753	10.9712	-12.5325
-4.38462	-29.3846		-18.9091	-46.9091		-66.5714	-36.5714		46.9712	-58.5325	51.9712	38.4675	-5.02879	-8.53247
36.6154	-8.38462		-7.90909	40.0909		-1.57143	6.42857		-41.0288	-3.53247	5.97121	-46.5325	-39.0288	15.4675
-5.38462	-30.3846		44.0909	38.0909		19.4286	92.4286		-43.0288	3.46753	-1.02879	-29.5325	23.9712	-1.53247
2.61538	26.6154		46.0909	50.0909		19.4286	31.4286		-16.0288	-13.5325	-9.02879	5.46753	-28.0288	12.4675
14.6154	-14.3846			20.0909		4.42857	45.4286		-41.0288	2.46753	17.9712	19.4675	-42.0288	15.4675
29.6154	-30.3846					63.4286	-40.5714		23.9712	-93.5325	36.9712	-30.5325	-16.0288	5.46753
	-6.38462					-1.57143	11.4286		17.9712	1.46753	-5.02879	-24.5325	48.9712	20.4675
	-71.3846						20.4286		-31.0288	-64.5325	25.9712	-8.53247	77.9712
	-47.3846						49.4286		-17.0288	15.4675	36.9712	28.4675
							17.4286		-60.0288	35.4675	22.9712	10.4675
									54.9712	-86.5325	30.9712	-26.5325
										-40.5325	-15.0288	-57.5325
											-53.0288	-9.53247
											6.97121	10.4675
											-34.0288	39.4675

## Sheet: Fig 4
A			B			C			D
alone	with mated female		with Vehicle	with 7-T		Ctrl	cVA		ppk23>TNTact	ppk23>TNTact with male	ppk23>TNTinact	ppk23>TNTinact with male
1.33333	-11.6667					14.375	-23.625		0.588235	-8.41176	-28.0556	-8.05556
-29.6667	-14.6667			-20.5217		52.375	-23.625		-15.4118	-23.4118	-9.05556	-1.05556
5.33333	-69.6667		2.47826			-28.625	55.375		17.5882	-28.4118	38.9444	-10.0556
-39.6667	-53.6667			17.4783		-41.625	-1.625		17.5882	69.5882	5.94444	-54.0556
-25.6667	-60.6667					-22.625			-9.41176	-1.41176	-19.0556	-45.0556
-14.6667	-57.6667		41.4783	18.4783		135.375	-4.625		48.5882	-2.41176	-29.0556	-40.0556
-20.6667	22.3333		-55.5217			-21.625	4.375		-1.41176	5.58824	-25.0556	25.9444
1.33333	-8.66667		34.4783						0.588235	-10.4118	12.9444	-13.0556
10.3333	-25.6667								-7.41176	5.58824	13.9444	-16.0556
-45.6667	-33.6667								19.5882	7.58824	26.9444	-18.0556
69.3333	-40.6667		-64.5217			-10.625	-3.625		18.5882	-11.4118	-5.05556	-24.0556
7.33333	-25.6667			-4.52174		-39.625			26.5882	-40.4118	20.9444	-2.05556
-20.6667	-35.6667		27.4783	-6.52174		-24.625	-4.625		-60.4118	-5.41176	20.9444	-50.0556
-1.66667	-32.6667		33.4783	-73.5217			-46.625		-17.4118	-17.4118	-1.05556
25.3333	31.3333		16.4783	-2.52174			7.375		-19.4118	-50.4118	12.9444
-44.6667	-45.6667			-70.5217			-20.625		-35.4118	-13.4118	-2.05556
35.3333	-18.6667								16.5882	-6.41176	-23.0556
87.3333	20.3333		21.4783								-12.0556
	-20.6667		-83.5217
	-1.66667		-63.5217
	-21.6667		-31.5217	-18.5217		39.375	-4.625
	8.33333		67.4783	4.47826		-6.625	-34.625
				-30.5217		-6.625	-2.625
			-4.52174	27.4783		-34.625	-6.625
			62.4783	-16.5217		-2.625	0.375
				22.4783		-1.625	-42.625
			-6.52174
			19.4783
			-37.5217
				-73.5217
				-43.5217
				-40.5217
				-65.5217
				-81.5217
				-34.5217
				-2.52174
				-29.5217
				-1.52174
				-36.5217
				-66.5217
				-69.5217
				-11.5217
			33.4783	5.47826
			5.47826	67.4783
			-34.5217	23.4783
			18.4783	-24.5217
			-2.52174

## Sheet: Fig 5
A			B			C			D			E													F
ATR-	ATR+		ATR-	ATR+		ATR-	ATR+		ATR-	ATR+		Con_Hx	Con_2MC	Con_7T	pC1a_Hx	pC1a_2MC	pC1a_7T	pC1bc_Hx	pC1bc_2MC	pC1bc_7T	pC1de_Hx	pC1de_2MC	pC1de_7T		Or47b2/+(Hx)	Or47b2/+(2MC)	Or47b2/+(7T)	Or47b2/2(Hx)	Or47b2/2(2MC)	Or47b2/2(7T)	Or47b3/+(Hx)	Or47b3/+(2MC)	Or47b3/+(7T)	Or47b3/3(Hx)	Or47b3/3(2MC)	Or47b3/3(7T)
19.9091	30.9091			-4.33333		-9.46667				44.4706		95.6116	146.566	110.069	107.368	98.0951	116.689	93.3165	132.233	135.164	85.257	102.772	95.7264		94.3859	116.477	124.71	109.976	90.7824	134.336	102.49	139.915	126.734	116.732	90.2471	137.359
-37.0909	24.9091			-54.3333		56.5333	2.53333		-3.52941	56.4706		101.384	123.108	95.8045	108.463	101.505	98.8805	94.0713	153.876	132.795	96.7511	110.746	95.8337		80.0747	128.731	142.026	84.4817	91.5021	141.77	101.724	150.238	125.356	97.2747	117.139	147.466
-3.09091	2.90909			6.66667		-15.4667	-51.4667			40.4706		99.1396	95.7549	137.971	93.4174	103.786	107.774	112.349	129.872	120.051	106.156	87.2837	104.344		116.199	120.043	112.317	116.422	123.281	131.58	92.7793	149.039	140.311	82.9272	96.1485	140.795
	-17.0909						16.5333		22.4706	29.4706		103.865	125.701	139.474	90.7513	109.579	92.198	100.263	132.458	120.308	111.836	93.1211	105.544		104.399	135.009	121.167	114.852	102.19	152.588	120.852	125.956	144.803	83.305	95.4287	134.701
1.90909	6.90909			15.6667			-18.4667					91.8438	101.612	159.983	112.68	82.0173	97.846	111.947	98.4865	138.673	101.038	108.171	89.0523		121.059	131.543	132.736	101.217	118.772	138.049	95.2293	131.749	136.879	100.81	112.77	144.066
35.9091	6.90909		-52.3333									90.5187	120.847	135.888	105.266	81.4742	102.435	111.189	97.5739	142.706	102.741	108.736	97.6087		97.5901	145.091	127.992	103.43	108.651	151.187	108.041	144.382	137.427	103.647	102.884	136.041
45.9091	-7.09091		56.6667									111.161	127.619	120.984	96.4974	90.5785	84.6046	89.1569	150.732	128.879	97.7057	110.062	98.2675		94.3705	138.675	131.296	85.1171	88.2177	97.1367	88.3133	122.855	136.228	109.348	113.753	129.255
-3.09091	171.909											106.476	132.55	120.009	85.5565	86.5877	81.1264	87.7065	150.545	133.752	98.5146	107.583	88.9405		91.9211	130.572	145.546	84.5047	87.6512	147.167	90.5718	147.418	146.296	105.956	93.8321	139.854
-31.0909	49.9091											102.467	134.539	107.085	101.377	96.989	114.197	94.8878	100.605	103.862	92.5241	94.0494	94.0615
-11.0909	34.9091											99.8608	115.19	134.76	86.5048	103.454	126.287	96.2103	102.941	102.605	99.2622	108.613	105.627
-10.0909	60.9091			-8.33333		-21.4667	17.5333		24.4706	76.4706		94.2782	105.685	134.829	115.576	99.6424	90.0286	100.934	136.733	128.956	103.797	98.7295	97.2381
33.9091	19.9091			-33.3333					19.4706			103.394	123.6	114.49	96.5425	93.9505	87.8865	107.968	142.292	129.844	104.417	109.189	93.7323
74.9091	-12.0909			0.666667					9.47059	69.4706								108.186	120.846	118.718
-0.09091	87.9091		-77.3333	-41.3333														108.392	125.114	126.779
-25.0909	-16.0909		-19.3333	8.66667					17.4706									89.1983	109.481	124.063
-76.0909	31.9091		-36.3333															94.2237	112.579	119.156
-34.0909	45.9091		-41.3333
51.9091	53.9091
-14.0909	24.9091
-2.09091	7.90909
35.9091	29.9091						-7.46667		13.4706	62.4706
39.9091			-3.33333	-36.3333		12.5333	40.5333			92.4706
-93.0909			-14.3333	28.6667					-29.5294	58.4706
			92.6667	3.66667
			36.6667	8.66667
			-2.33333
			-54.3333				37.5333			79.4706
			-0.33333	9.66667					-22.5294	44.4706
			22.6667						-8.52941
			41.6667	-29.3333					-30.5294	102.471
										-16.5294
				75.6667						63.4706
			125.667	5.66667		-64.4667	2.53333		-11.5294	61.4706
			-38.3333			24.5333	4.53333		-25.5294	92.4706
			-36.3333	-16.3333					-21.5294	53.4706
						-9.46667	23.5333		26.4706	53.4706
						21.5333			40.4706	64.4706
									-20.5294	-18.5294
						-15.4667	33.5333
						42.5333	30.5333
						-69.4667	-8.46667
						6.53333
						14.5333
						26.5333

## Sheet: Fig 6
A			B				C
pC1a>PAC with DimL	pC1a>PAC with BL	pC1b,c>PAC with DimL	pC1b,c>PAC with BL	pC1d,e>PAC with DimL	pC1d,e>PAC with BL		Before	1min	10min		pC1b,c>1013	1013>w
-35.3889	-10.3889		-26.1364	-15.0952			29.161	53.865	19.719		50	25
			-19.1364	-9.09524	16.9048		34.38	51.222	22.721		20	21
-26.3889	-8.38889			29.9048			18.211	48.321	20.73		78	50
	-6.38889		-38.1364	34.9048			33.392	53.473	25.494			23
			-16.1364		-7.09524		29.651	55.257	15.341
					-19.0952		21.875	57.893	20.697
					-5.09524		18.486	61.855	12.514
							44.929	65.28	21.704
							32.478	83.26	21.64
14.6111	-37.3889
-13.3889	-40.3889		-47.1364	-8.09524
			9.86364	18.9048	-28.0952
				1.90476
			-87.1364
			-35.1364	25.9048	29.9048
			-21.1364	18.9048	-9.09524
					19.9048
150.611			7.86364
-14.3889			-43.1364	27.9048	-4.09524
19.6111	15.6111		-19.1364		3.90476
-21.3889	-39.3889		-27.1364	-36.0952	1.90476
3.61111			-54.1364	14.9048
				35.9048	22.9048
-28.3889	8.61111			4.90476	-17.0952
-8.38889	3.61111		-27.1364	-22.0952	-3.09524
-9.38889			-10.1364	-24.0952	-15.0952
	74.6111		-14.1364
-2.38889			-31.1364
	-1.38889
	-30.3889		-32.1364
	-21.3889
	-57.3889
	-22.3889	9.86364	-67.1364	-101.095
13.6111	4.61111	2.86364			-34.0952
-30.3889	-103.389	-86.1364	-18.1364	5.90476
-3.38889	38.6111	-1.13636	-7.13636	-9.09524	-18.0952
18.6111	-13.3889	-5.13636	-24.1364
-27.3889	14.6111	24.8636
	38.6111	7.86364
	9.61111	59.8636
		5.86364
		16.8636	-15.1364		-28.0952
		-8.13636	-19.1364	9.90476	41.9048
		10.8636	1.86364	-5.09524	-12.0952
		24.8636
		23.8636
		8.86364
		16.8636
		-25.1364
		-5.13636	-32.1364
		-31.1364	-37.1364
		-4.13636
		-27.1364
		-20.1364

## Sheet: Fig2-S1
+>TNTact	+>TNTact with male	Or13a>TNTact	Or13a>TNTact with male	Or19a>TNTact	Or19a>TNTact with male	Or23a>TNTact	Or23a>TNTact with male	Or43a>TNTact	Or43a>TNTact with male	Or47b>TNTact	Or47b>TNTact with male	Or65a>TNTact	Or65a>TNTact with male	Or65b>TNTact	Or65b>TNTact with male	Or65c>TNTact	Or65c>TNTact with male	Or67d>TNTact	Or67d>TNTact with male	Or83c-1>TNTact	Or83c-1>TNTact with male	Or88a>TNTact	Or88a>TNTact with male
47.6296	-4.37037	46.6667	-25.3333	-16.125	-42.125	-37.0909	-38.0909	-23.3889	-4.38889	-16.1667	56.8333	-4.76923	-38.7692	4.5	-23.5	21.4	-34.6	52	-11	-28.5	-94.5	-0.428571	-9.42857
33.6296	-70.3704	9.66667	-47.3333	-16.125	-23.125	9.90909	19.9091	21.6111	-44.3889	-7.16667	16.8333	50.2308	-31.7692	-3.5	-5.5	41.4	1.4	16	-68	55.5	-74.5	-25.4286	-5.42857
5.62963	-39.3704	20.6667	6.66667	-63.125	9.875	-48.0909	-19.0909	13.6111	-68.3889	43.8333	35.8333	-25.7692	2.23077	-10.5	13.5	9.4	-20.6	-9	15	60.5	-24.5	-28.4286	18.5714
2.62963	-49.3704	-9.33333	-4.33333	-0.125	-11.125	-31.0909	-9.09091	38.6111	-21.3889	-56.1667	-66.1667	-2.76923	-34.7692	-26.5	-16.5	-24.6	80.4	49	11	0.5	-23.5	-9.42857	-45.4286
-5.37037	-6.37037	-37.3333	-2.33333	35.875	1.875	-45.0909	-4.09091	-23.3889	-45.3889	14.8333	-37.1667	-15.7692	-35.7692	26.5	-53.5	-20.6	13.4	12	-48	-26.5	-53.5	-0.428571	-42.4286
12.6296	-47.3704	-50.3333	-50.3333	39.875	-18.125	36.9091	-26.0909	-24.3889	-24.3889	33.8333	-43.1667	55.2308	-25.7692	21.5	-50.5	50.4	-23.6	-24	27	56.5	-74.5	12.5714	42.5714
8.62963	-14.3704	-26.3333	-8.33333	2.875		16.9091	-34.0909	-5.38889	-32.3889	-1.16667	-3.16667	6.23077	-44.7692	-17.5	-48.5	5.4	33.4	-17	-8	-36.5	-51.5	-23.4286	-12.4286
-23.3704	-20.3704	-31.3333	-39.3333	16.875		4.90909	-20.0909	-10.3889	-106.389	-30.1667	19.8333	3.23077	-36.7692	17.5	-11.5	-10.6	-38.6	-9	-50	-32.5	-48.5	14.5714	0.571429
-15.3704	-37.3704	77.6667	-22.3333			43.9091	-68.0909	31.6111	-34.3889	-45.1667	-10.1667	-25.7692	-6.76923	-21.5	-46.5	28.4	-30.6	-5	-8	-4.5	-57.5	22.5714	-31.4286
20.6296	-10.3704		-55.3333			43.9091	-21.0909	-91.3889	-31.3889	-2.16667	6.83333	-10.7692	4.23077	-22.5	-27.5	-2.6	-4.6	-36	-11	54.5	-45.5	-8.42857	-31.4286
10.6296	-37.3704		10.6667			4.90909	-45.0909	2.61111	-41.3889	18.8333	-7.16667	-41.7692	-28.7692	8.5	-25.5	-12.6	-23.6	3	37	-16.5	-45.5	-20.4286	-54.4286
10.6296	-17.3704		-19.3333					-26.3889	-78.3889	46.8333		22.2308	-13.7692	-44.5	-54.5	-28.6	-46.6	-38	-43	34.5	-11.5	39.5714	-44.4286
35.6296	-3.37037							30.6111	-59.3889			-9.76923	-42.7692	16.5	-6.5	-30.6	-0.6	-33	-53	-25.5	-69.5	-22.4286	-72.4286
-16.3704	-23.3704							5.61111	1.61111				0.230769	10.5	-17.5	-38.6	-36.6	35	-62	-36.5	-63.5	-6.42857	-56.4286
-30.3704	9.62963							-2.38889	61.6111				-64.7692	-21.5		-4.6	-47.6	4	-61	24.5	20.5	-20.4286	23.5714
-17.3704	-41.3704							16.6111	16.6111				12.2308	15.5		30.4	-2.6		-7	-40.5	-63.5	-20.4286	-4.42857
-6.37037	-24.3704							-2.38889						20.5		14.4	-67.6		25	-51.5	-7.5	-25.4286	-1.42857
7.62963	-39.3704							48.6111						26.5		-20.6	-38.6		-14	7.5		43.5714	-5.42857
-13.3704	18.6296															-5.6			-36	36.5		48.5714	20.5714
-3.37037	-51.3704															-1.6				-31.5		5.57143
-26.3704	-60.3704																					24.5714
-0.37037	-5.37037
-22.3704	-34.3704
17.6296	-3.37037
-6.37037	-43.3704
-26.3704	-6.37037
-0.37037	9.62963

## Sheet: Fig3-S1
A					B
vehicle	144ng per paper	720ng per paper	1440ng per paper		vehicle	144ng per paper	720ng per paper	1440ng per paper
16.6538	42.6538	-21.3462	-28.3462		62.4545	22.4546	-31.5455	-55.5455
2.65385	-2.34615	-0.34615	22.6538		46.4545	22.4546	-1.54545	-75.5455
-0.34615	-3.34615	-10.3462	4.65385		50.4545	26.4546	4.45455	-33.5455
51.6538	2.65385	19.6538	12.6539		2.45454	54.4545		35.4545
-50.3462	2.65385	5.65385	4.65385		43.4545	69.4545		-3.54545
-41.3462	-4.34615	4.65385	-22.3462		-40.5455
13.6539	10.6539	59.6538	-13.3462		21.4546
-73.3462	18.6538	19.6538	16.6538		11.4545
36.6538	-29.3462	2.65385	17.6538		-78.5455
-13.3462	24.6538	19.6538	-0.34615		-53.5455
10.6539	27.6538	4.65385	15.6539		-15.5455
-29.3462	24.6538	3.65385	100.654		9.45454	-22.5455
-12.3462	36.6538	2.65385	1.65385		54.4545		65.4545	-10.5455
-61.3462	24.6538	40.6538			46.4545	-15.5455
-55.3462		-14.3462			-12.5455
-48.3462		20.6538			-2.54545
40.6538		-39.3462			-70.5455
34.6538		6.65385
-46.3462
57.6538						69.4545	41.4545	59.4545
14.6539						-85.5455	21.4546	67.4545
15.6539						30.4546	30.4546	19.4546
82.6539							-0.54545
-1.34615
18.6538
36.6538
					-66.5455	-18.5455	5.45455	23.4546
					-76.5455	-21.5455	-59.5455	-9.54545
					-32.5455	-23.5455	12.4545	-17.5455
					33.4545	-41.5455	-45.5455
					67.4545

## Sheet: Fig3-S2
A				B
Alone	with PromE(800)-Gal4>UAS-TraIR ♀	with PromE(800)-Gal4>UAS-Tra ♂		Alone	with D.melanogaster ♂	with D.simulans ♂	with D.sechellia ♂	with D.erecta ♂	with D.yakuba ♂
-19.1212	-23.1212	-60.1212		9.8	-37.2	-67.2	-25.2	-40.2	19.8
-4.12121	-30.1212	-43.1212		-6.2	-72.2	-19.2	-33.2	-38.2	27.8
-6.12121	21.8788	-34.1212		-2.2	-31.2	-45.2	-17.2	-9.2	-67.2
-10.1212	-40.1212	-24.1212		32.8	-3.2	-54.2	-33.2	-54.2	67.8
29.8788	-69.1212	-31.1212		-19.2	27.8	-59.2	-15.2	37.8	14.8
79.8788	-24.1212	-31.1212		-20.2	-61.2	-36.2	-51.2	-33.2	-12.2
9.87879	-18.1212	-32.1212		-5.2	-66.2	-32.2	-11.2	-33.2	8.8
-8.12121	59.8788	-50.1212		-44.2	-48.2	-21.2	76.8	-11.2	-49.2
-23.1212	24.8788	-59.1212		22.8	-61.2	-66.2	-71.2	-53.2	-44.2
4.87879	21.8788	-56.1212		4.8	-51.2	-51.2	-29.2	-24.2	3.8
0.878788	-30.1212	-25.1212		-24.2	-32.2	-8.2	-62.2	-50.2	-29.2
4.87879	-24.1212	-57.1212		24.8	-53.2	-83.2	-48.2	-46.2	18.8
-21.1212	-30.1212	3.87879		-20.2	-75.2	-51.2	-46.2	-70.2	24.8
7.87879	-32.1212	-41.1212		-12.2	-68.2	-52.2	-50.2	-42.2	-0.2
-8.12121	-34.1212	-34.1212		-7.2	-54.2	-74.2	-22.2	-13.2	-83.2
-4.12121	-69.1212	-57.1212		18.8	-58.2	-36.2	-42.2	-20.2	-51.2
30.8788	-29.1212	-51.1212		33.8	-84.2	-41.2	-62.2	-13.2	-57.2
-21.1212	-31.1212			5.8	-14.2	-51.2	-50.2	-44.2	-17.2
-22.1212	-28.1212			5.8	-41.2	-1.2	-77.2	-13.2	40.8
-7.12121	-45.1212			1.8	-57.2	-19.2	29.8		-65.2
-46.1212	-31.1212				-49.2	-46.2			20.8
20.8788	-40.1212				-30.2
2.87879	-54.1212				-3.2
-26.1212	-1.12121
22.8788	-18.1212
-22.1212	-28.1212
-14.1212	-31.1212
-9.12121	-59.1212
16.8788	-49.1212
31.8788	9.87879
3.87879	-28.1212
3.87879	-18.1212
-0.12121	-24.1212
	-11.1212
	14.8788
	-66.1212

## Sheet: Fig3-S3
vehicle	1500ng per paper	750ng per paper	375ng per paper	150ng per paper	75ng per paper
-8.05556	16.9444	19.9444	-3.05556	17.9444	8.94444
6.94444	7.94444	-3.05556	31.9444	5.94444	-13.0556
-5.05556	-11.0556	34.9444	-9.05556	-11.0556	-22.0556
-6.05556	11.9444	-30.0556	11.9444	37.9444	31.9444
-14.0556	-27.0556	-34.0556	13.9444	4.94444	41.9444
-11.0556	10.9444	-24.0556	-31.0556	-57.0556	14.9444
-31.0556	33.9444	-36.0556	11.9444	1.94444	20.9444
45.9444	36.9444	-37.0556	19.9444	11.9444	-11.0556
-2.05556	2.94444	23.9444	67.9444	17.9444	20.9444
-3.05556	-1.05556	-10.0556	-38.0556	-6.05556	-3.05556
56.9444	2.94444	-28.0556	-15.0556	59.9444	-5.05556
27.9444	-17.0556	-10.0556	84.9444	-7.05556	9.94444
-1.05556	25.9444	-56.0556	9.94444	-14.0556	-57.0556
-14.0556		-46.0556	15.9444	78.9444	4.94444
-23.0556		-39.0556	32.9444		-2.05556
-14.0556			-30.0556		29.9444
-30.0556			2.94444		36.9444
24.9444					-25.0556

[truncated: 5 more sheets: Fig4-S1, Fig5-S1, Fig5-S2, Fig5-S3, Fig6-S1]
